# Supplementary material for: Resveratrol induces mitochondria-mediated, caspase-independent apoptosis in murine prostate cancer cells
Source: PubMed Central journal article supplement (PMC5400554; doi:10.18632/oncotarget.14947), 2017-02-01
Supplement: oncotarget-08-20895-s001.pdf [file oncotarget-08-20895-s001.pdf]

# Resveratrol induces mitochondria-mediated, caspase-independent apoptosis in murine prostate cancer cells

## SUPPLEMENTARY FIGURES

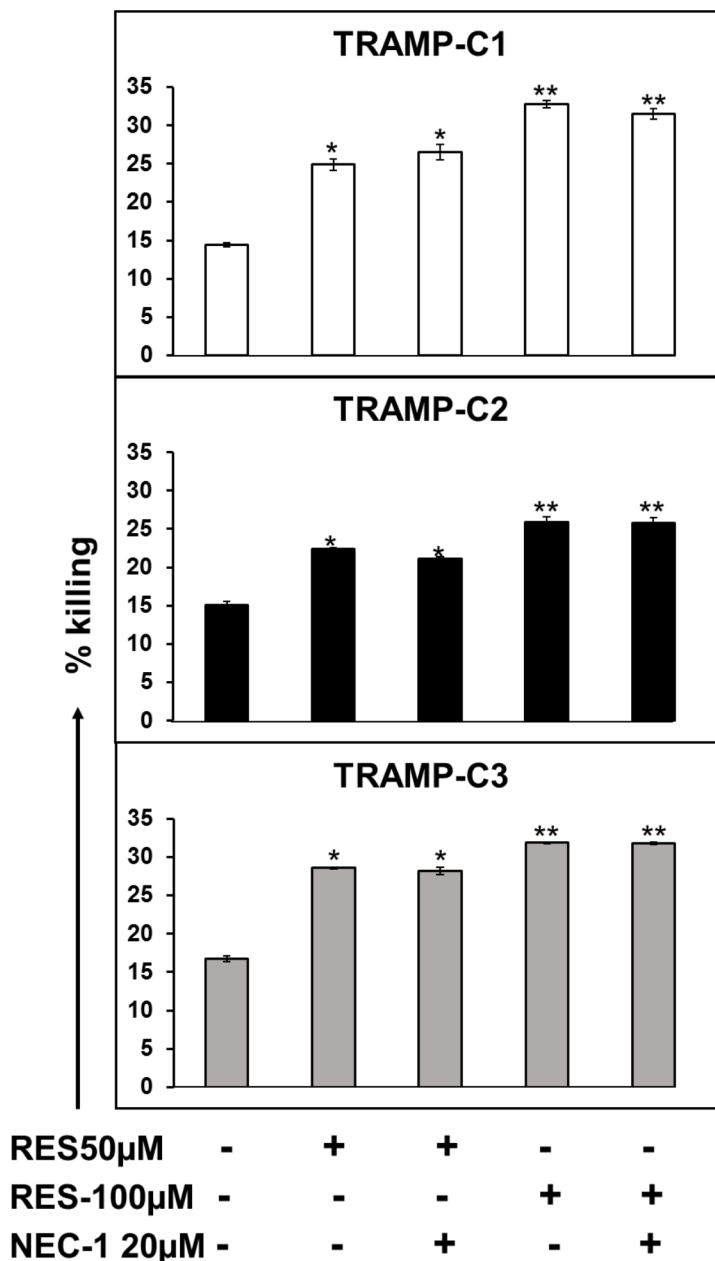

**Supplementary Figure 1: RES kills tumor cells.** No significant difference was evident when cells were incubated with RES (50 or 100 µM) in the presence or absence of Nec-1. The data shown are from three independent experiments performed in triplicates. **A.** TRAMP-C1 cells, **B.** TRAMP-C2 cells, and **C.** TRAMP-C3 cells respectively. Results represented as mean values of ±SEM (\*p<0.05 and \*\*p<0.01; control vs. treatment).

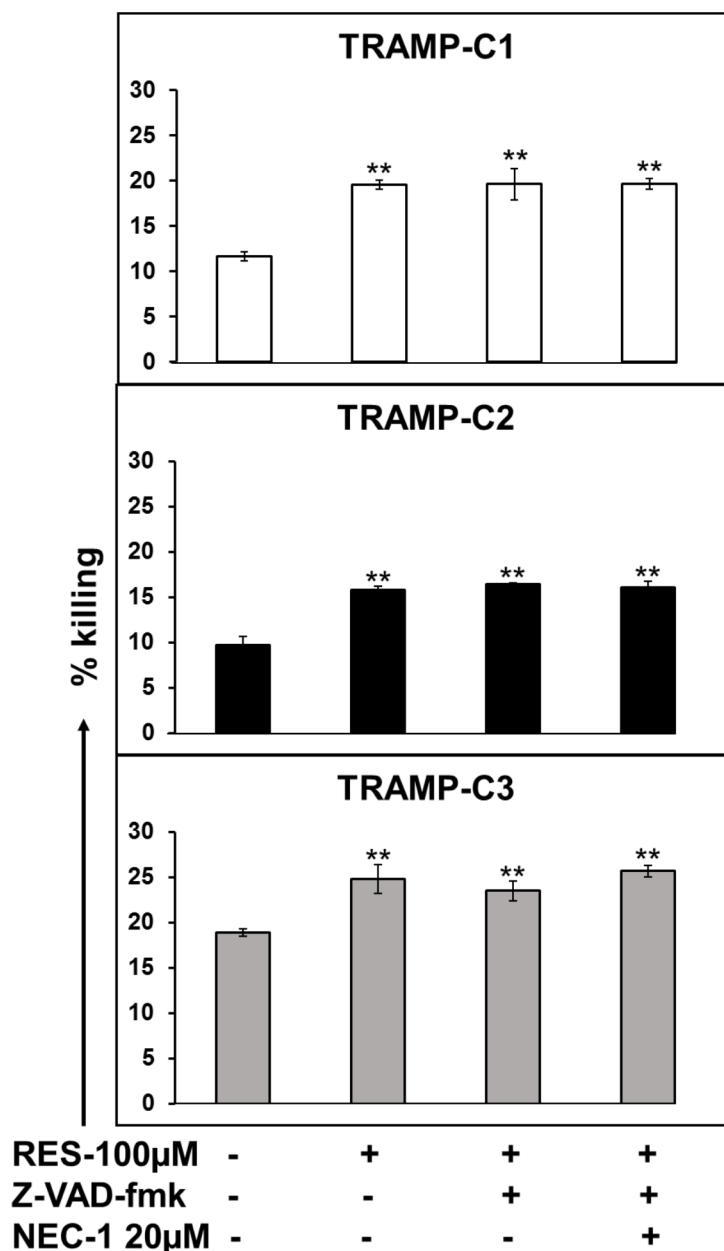

**Supplementary Figure 2: RES induces caspase-independent cell killing.** No significant difference was found when cells were exposed to 100µM of RES with or without z-VAD-fmk and Nec-1. Thus, RES kills tumor in a caspase-independent manner. The data are from three independent experiments performed in triplicate. Figure A. TRAMP-C1 cells, B. TRAMP-C2 cells, and C. TRAMP-C3 cells respectively. Data demonstrated mean values of ±SEM (\*\*p<0.01; control vs. treatment).
